# Supplementary material for: Echinoderms provide missing link in the evolution of PrRP/sNPF-type neuropeptide signalling
Source: eLife. 2020 Jun 24;9:e57640. doi: 10.7554/eLife.57640 (PMC7314547; doi:10.7554/eLife.57640)
Supplement: Figure 5—source data 1. [file elife-57640-fig5-data1.xlsx]

## Sheet: Data for Fig. 5A
Figure 5 - source data for figure 5A
ArPrRP + Ar-sNPF/PrRP receptor first replicate raw values				ArPrRP + Ar-sNPF/PrRP receptor fifth replicate				ArPrRP + Ar-sNPF/PrRP receptor sixth replicate
10-5 M	368977	363116	348521	10-5 M	193834	208181	214167	10-5 M	316758	295795	353704
ArPrRP + Ar-sNPF/PrRP receptor first replicate raw values				ArPrRP + Ar-sNPF/PrRP receptor fifth replicate				ArPrRP + Ar-sNPF/PrRP receptor sixth replicate
Basal media	75600	66981	70065	Basal media	64456	69792	65553	Basal media	104221	109271	113308
For this graph we used the raw data of the first, fifth, and sixth replicate, which were experiments with the closest raw luminescence values. Thus, there are 3 replicates for 10-5 M ArPrRP and basal media

## Sheet: Data for Fig. 5B Ar-PrRP
Figure 5 - source data for figure 5B
ArPrRP + Ar-sNPF/PrRP receptor first replicate raw values					ArPrRP + Ar-sNPF/PrRP receptor average values			Normalized		ArPrRP + Ar-sNPF/PrRP receptor second replicate raw values					ArPrRP + Ar-sNPF/PrRP recepto average values		Normalized		ArPrRP + Ar-sNPF/PrRP receptor third replicate raw values					ArPrRP + Ar-sNPF/PrRP receptor average values		Normalized		ArPrRP + Ar-sNPF/PrRP receptor fouth replicate raw values					ArPrRP + Ar-sNPF/PrRP receptor average value			normalized		ArPrRP + Ar-sNPF/PrRP receptor fifth replicate					ArPrRP + Ar-sNPF/PrRP receptor average value			normalized		ArPrRP + Ar-sNPF/PrRP receptor sixth replicate
10-5 M	368977	363116	348521		-5	360205		94.2453		10-5 M	121896	104781	113063		113247		91.7891		10-5 M	132764	158552	149765		147027		89.35		10-5 M	116481	124527	111666		-5	117558		93.5643		10-5 M	193834	208181	214167		10-5 M	205394		84.5212		10-5 M	316758
10-6 M	350773	360999	315564		-6	342445		89.4373		3x10-6 M	121906	108102	80308		103439		82.4891		3x10-6 M	161022	151119	162186		158109		97.1357		3x10-6 M	141516	103785	120791		-5.3	122031		98.7673		3x10-6 M	215695	221538	230922		3x10-6 M	222718		95.0257		3x10-6 M	360622
10-7 M	361074	381297	353997		-7	365456		95.956		10-6 M	100753	119854	88796		103134		82.2005		10-6 M	159067	122069	147168		142768		86.3578		10-6 M	115618	109908	111928		-6	112485		87.6626		10-6 M	198909	200035	201543		10-6 M	200162		81.349		10-6 M	291379
10-8 M	333829	335387	377870		-8	349029		90.6046		3x10-7 M	109309	121291	100705		110435		89.1231		3x10-7 M	157489	136501	161151		151714		92.6426		3x10-7 M	102557	125788	105731		-6.3	111359		86.3527		3x10-7 M	220907	223871	218661		3x10-7 M	221146		94.0726		3x10-7 M	389190
10-9 M	353887	345228	290852		-9	329989		84.4022		10-7 M	95803	106732	92303		98279.3		77.597		10-7 M	117703	141281	137968		132317		79.0156		10-7 M	121721	127962	119588		-7	123090		99.9999		10-7 M	205796	203073	197384		10-7 M	202084		82.5144		10-7 M	275839
10-10 M	289510	297489	280066		-10	289022		71.0566		3 x 10-8 M	118452	110874	104685		111337		89.9784		3 x 10-8 M	134893	151900	130497		139097		83.7785		3 x 10-8 M	83332	91374	94845		-7.3	89850.3		61.3322		3 x 10-8 M	192276	220849	197707		3 x 10-8 M	203611		83.4398		3 x 10-8 M	340129
10-11 M	245204	208810	183450		-11	212488		46.1249		10-8 M	101773	113308	76131		97070.7		76.4509		10-8 M	152184	143017	120328		138510		83.3661		10-8 M	103223	98112	108769		-8	103368		77.0572		10-8 M	165682	165668	209684		10-8 M	180345		69.3326		10-8 M	275419
10-12 M	182648	150841	178001		-12	170497		32.4457		3 x 10-9 M	107353	84539	75869		89253.7		69.0388		3 x 10-9 M	126885	123609	126220		125571		74.2762		3 x 10-9 M	69880	79832	88356		-8.3	79356		49.1242		3 x 10-9 M	174618	182991	189542		3 x 10-9 M	182384		70.5689		3 x 10-9 M	306283
10-13 M	112641	91771	89924		-13	98112		8.8656		10-9 M	77927	66640	97938		80835		61.0561		10-9 M	127497	110303	111103		116301		67.7633		10-9 M	85654	110176	89428		-9	95086		67.4228		10-9 M	164859	171182	193843		10-9 M	176628		67.079		10-9 M	232887
10-14 M	99256	82553	80987		-14	87598.7		5.44076		3 x 10-10 M	105071	90527	89927		95175		74.6534		3 x 10-10 M	129772	121061	132469		127767		75.819		3 x 10-10 M	74799	72441	72543		-9.3	73261		42.034		3 x 10-10 M	159152	159783	165176		3 x 10-10 M	161370		57.8275		3 x 10-10 M	264601
										10-10 M	62489	47372	70452		60104.3		41.3991		10-10 M	76720	97564	89927		88070.3		47.9297		10-10 M	105092	110515	108590		-10	108066		82.522		10-10 M	151660	149320	162145		10-10 M	154375		53.5859		10-10 M	190754
Basal media	75600	66981	70065							3 x 10-11 M	51567	83835	68212		67871.3		48.7639		3 x 10-11 M	92348	68217	70452		77005.7		40.1562		3 x 10-11 M	63627	70024	59719		-10.3	64456.7		31.792		3 x 10-11 M	153142	148925	152472		3 x 10-11 M	151513		51.8506
Basal media average			70882							10-11 M	31396	31836	55348		39526.7		21.8872		10-11 M	98377	67913	68212		78167.3		40.9723		10-11 M	88390	89505	89371		-11	89088.7		59.2014		10-11 M	131584	135427	152285		10-11 M	139765		44.7274		10-11 M	178854
										3 x 10-12 M	42454	71411	48104		53989.7		35.6011		3 x 10-12 M	41818	40370	49931		44039.7		16.9957		3 x 10-12 M	55489	71126	65202		-11.3	63939		31.1898		3 x 10-12 M	139372	123391	140500		3 x 10-12 M	134421		41.4869
										10-12 M	23283	17214	43325		27940.7		10.9012		10-12 M	56955	44209	43325		48163		19.8926		10-12 M	65974	85123	61135		-12	70744		39.106		10-12 M	134107	133285	148709		10-12 M	138700		44.0816		10-12 M	146942
For this initial experiment a smaller range of concentrations were tested. After this, intermediate concentrations were aslo tested.										3 x 10-13 M	45469	36477	25759		35901.7		18.4499		3 x 10-13 M	39141	29537	25759		31479		8.17118		3 x 10-13 M	55404	54268	58602		-12.3	56091.3		22.0606		3 x 10-13 M	105554	94810	104311		3 x 10-13 M	101558		21.5607
The normalized data obtained by from this experiment were also included in the final graph										10-13 M	27590	21053	27258		25300.3		8.39765		10-13 M	36840	25357	27258		29818.3		7.00447		10-13 M	41053	29430	32359		-13	34280.7		-3.31149		10-13 M	120538	135170	135967		10-13 M	130558		39.1448		10-13 M	115660
										3 x 10-14 M	23049	21758	26491		23766		6.94279		3 x 10-14 M	30032	32786	26491		29769.7		6.97028		3 x 10-14 M	58245	49639	56690		-13.3	54858		20.6259		3 x 10-14 M	72926	75209	67638		3 x 10-14 M	71924.3		3.5922
										10-14 M	22005	33529	29195		28243		11.1879		10-14 M	28853	32982	29195		30343.3		7.37331		10-14 M	33532	34451	32242		-14	33408.3		-4.32628		10-14 M	119503	124807	127383		10-14 M	123898		35.1061		10-14 M	98070
										3 x 10-15 M	17878	17191	19399		18156		1.62333		3 x 10-15 M	27688	37393	19399		28160		5.8394		3 x 10-15 M	54709	45844	58298		-14.3	52950.3		18.4067		3 x 10-15 M	71169	62092	62510		3 x 10-15 M	65257		-0.450516
										10-15 M	19949	16358	21430		19245.7		2.65657		10-15 M	19212	23830	21430		21490.7		1.15383		10-15 M	29620	31535	34561		-15	31905.3		-6.07471		10-15 M	106084	120969	125732		10-15 M	117595		31.2845		10-15 M	101744
										Basal media	16519	15321	17492						Basal media	20314	21230	18001						Basal media	41688.5	36531	33162.5							Basal media	64456	69792	65553							Basal media	104221
										Basal media average			16444						Basal media average			19848.3						Basal media average			37127.3							Basal media average			66600.3							Basal media average
[truncated: 5 more columns]

## Sheet: Data for Fig. 5B other peptides
Figure 5 - source data for figure 5B
LQ+Ar-sNPF/PrRP receptor first replicate					LQ+Ar-sNPF/PrRP receptor average values			Normalized		LNPRFa+Ar-sNPF/PrRP receptor first replicate					LNPRFa+Ar-sNPF/PrRP receptor average			normalized
3 x 10-5 M	122109	116323	91527		3 x 10-5 M	109986		3.60633		3 x 10-5 M	132371	141426	126233		3 x 10-5 M	133343		3.12592
3 x 10-6 M	109565	107588	89506		3 x 10-6 M	102220		0.794275		3 x 10-6 M	117073	127747	114500		3 x 10-6 M	119773		-2.28673
3 x 10-7 M	108322	102519	94951		3 x 10-7 M	101931		0.689637		3 x 10-7 M	126339	124946	119026		3 x 10-7 M	123437		-0.825395
3 x 10-8 M	107926	98005	101175		3 x 10-8 M	102369		0.848224		3 x 10-8 M	125123	122448	124061		3 x 10-8 M	123877		-0.649774
3 x 10-9 M	109847	109682	108941		3 x 10-9 M	109490		3.42664		3 x 10-9 M	121123	129432	125618		3 x 10-9 M	125391		-0.046004
3 x 10-10 M	115158	100075	93893		3 x 10-10 M	103042		1.092		3 x 10-10 M	131552	134257	112665		3 x 10-10 M	126158		0.259929
3 x 10-11 M	102261	107771	89295		3 x 10-11 M	99775.7		-0.0906364		3 x 10-11 M	142070	130651	114663		3 x 10-11 M	129128		1.44457
3 x 10-12 M	98217	95068	90593		3 x 10-12 M	94626		-1.95518		3 x 10-12 M	120828	133030	105595		3 x 10-12 M	119818		-2.26902
3 x 10-13 M	105787	104106	89478		3 x 10-13 M	99790.3		-0.0853298		3 x 10-13 M	119437	120244	130375		3 x 10-13 M	123352		-0.859299
3 x 10-14 M	101433	100918	92472		3 x 10-14 M	98274.3		-0.634229		3 x 10-14 M	127625	117340	106744		3 x 10-14 M	117236		-3.29867
3 x 10-15 M	111017	99964	90862		3 x 10-15 M	100614		0.213005		3 x 10-15 M	115111	107153	122885		3 x 10-15 M	115050		-4.17083
basal average	100026									basal average	125506
positive control	353704									positive control	353704
LQ+Ar-sNPF/PrRP receptor second replicate					LQ+Ar-sNPF/PrRP receptor average values			Normalized		LNPRFa+Ar-sNPF/PrRP receptor second replicate					LNPRFa+Ar-sNPF/PrRP receptor average values			normalized
3 x 10-5 M	62761	68851	55598		3 x 10-5 M	62403.3		2.35939		3 x 10-5 M	85342	80708	81596		3 x 10-5 M	82548.7		10.7985
3 x 10-6 M	64852	59686	48727		3 x 10-6 M	57755		-0.419703		3 x 10-6 M	80138	72852	79765		3 x 10-6 M	77585		7.70585
3 x 10-7 M	56142	56860	50597		3 x 10-7 M	54533		-2.34603		3 x 10-7 M	71520	72328	70032		3 x 10-7 M	71293.3		3.78584
3 x 10-8 M	64268	52128	50660		3 x 10-8 M	55685.3		-1.65709		3 x 10-8 M	75272	76223	76567		3 x 10-8 M	76020.7		6.7312
3 x 10-9 M	65941	62744	55401		3 x 10-9 M	61362		1.73681		3 x 10-9 M	71293	68114	98016		3 x 10-9 M	79141		8.67532
3 x 10-10 M	65834	70637	52119		3 x 10-10 M	62863.3		2.63441		3 x 10-10 M	78237	78178	69148		3 x 10-10 M	75187.7		6.2122
3 x 10-11 M	61449	53346	51565		3 x 10-11 M	55453.3		-1.7958		3 x 10-11 M	72474	70620	75349		3 x 10-11 M	72814.3		4.7335
3 x 10-12 M	58244	58234	57213		3 x 10-12 M	57897		-0.334806		3 x 10-12 M	67463	68242	67143		3 x 10-12 M	67616		1.49469
3 x 10-13 M	66174	69595	54190		3 x 10-13 M	63319.7		2.90723		3 x 10-13 M	68594	68962	75899		3 x 10-13 M	71151.7		3.69758
3 x 10-14 M	61016	52598	50623		3 x 10-14 M	54745.7		-2.21889		3 x 10-14 M	76299	72555	73073		3 x 10-14 M	73975.7		5.45707
3 x 10-15 M	60931	53852	51025		3 x 10-15 M	55269.3		-1.9058		3 x 10-15 M	77619	66588	61823		3 x 10-15 M	68676.7		2.15554
basal average	58457					58457				basal average	65217
positive control	214167					214167				positive control	214167
LQ+Ar-sNPF/PrRP receptor third replicate					LQ+Ar-sNPF/PrRP receptor average values			Normalized		LNPRFa+Ar-sNPF/PrRP receptor second replicate					LNPRFa+Ar-sNPF/PrRP receptor average values			Normalized
3 x 10-5 M	68516	71038	67614		3 x 10-5 M	69056		2.54173		3 x 10-5 M	68009	71285	73748		3 x 10-5 M	71014		5.09675
3 x 10-6 M	66029	51770	50641		3 x 10-6 M	56146.7		-1.65311		3 x 10-6 M	70923	73667	69029		3 x 10-6 M	71206.3		5.15801
3 x 10-7 M	67578	64133	51107		3 x 10-7 M	60939.3		-0.0957509		3 x 10-7 M	69153	66106	73328		3 x 10-7 M	69529		4.62376
3 x 10-8 M	56250	66624	62176		3 x 10-8 M	61683.3		0.146009		3 x 10-8 M	72035	75083	67346		3 x 10-8 M	71488		5.24772
3 x 10-9 M	59861	52370	70356		3 x 10-9 M	60862.3		-0.120772		3 x 10-9 M	70627	57536	62890		3 x 10-9 M	63684.3		2.7622
3 x 10-10 M	65825	58059	71107		3 x 10-10 M	64997		1.22277		3 x 10-10 M	50958	60464	59250		3 x 10-10 M	56890.7		0.598368
3 x 10-11 M	66786	67430	56058		3 x 10-11 M	63424.7		0.711849		3 x 10-11 M	56701	57761	65255		3 x 10-11 M	59905.7		1.55867
3 x 10-12 M	61999	60692	58997		3 x 10-12 M	60562.7		-0.218147		3 x 10-12 M	57736	58390	60210		3 x 10-12 M	58778.7		1.19971
3 x 10-13 M	61258	52423	70232		3 x 10-13 M	61304.3		0.0228546		3 x 10-13 M	62050	51706	56917		3 x 10-13 M	56891		0.598474
3 x 10-14 M	64561	54055	64656		3 x 10-14 M	61090.7		-0.0465757		3 x 10-14 M
3 x 10-15 M	62421	65733	65355		3 x 10-15 M	64503		1.06225		3 x 10-15 M
basal average	61234									basal average	55012
positive control	368977									positive control	368977
The negative control was obtained independently for each experiment by the addition of the cell culture media with no peptide added.
The positive control was obtained by the addition of the ArPrRP at the 10-5 M concentration.
The data obtained by the addition of the LQ peptide and the LNPRFamide peptide at different concentrations is reported here.
Normalisation was done using the basal average as the 0% and the positive control as the 100%.

## Sheet: Data for Fig 5 -fig sup2
Figure 5 -source data for figure supplement 2
ArPrRP+empty pcDNA3.1 first replicate raw values					ArPrRP+empty pcDNA3.1 average values			Normalized		ArPrRP+empty pcDNA3.1 second replicate raw values					ArPrRP+empty pcDNA3.1 average values			Normalized			ArPrRP+empty pcDNA3.1third replicate raw values					ArPrRP+empty pcDNA3.1 third replicate average values				Normalised
10-5 M	24814	27502	21990		10-5 M	24768.7		4.3118		10-5 M	38569	36243	35917		10-5 M	36909.7		3.19499			10-5 M	33171	27404	23618		10-5 M	28064.3			-1.08011
10-6 M	20987	18942.7	27342.3		10-6 M	22424		2.71317		10-6 M	31106	31867	36926		10-6 M	33299.7		1.20295			10-6 M	17756	26201	34795		10-6 M	26250.7			-2.15253
10-7 M	24802	26121	26209		10-7 M	25710.7		4.95407		10-7 M	35981	38409	33938		10-7 M	36109.3		2.75336			10-7 M	25488	36591	21091		10-7 M	27723.3			-1.28174
10-8 M	26403	25595	19900		10-8 M	23966		3.76453		10-8 M	30843	37823	34837		10-8 M	34501		1.86586			10-8 M	27468	32104	25391		10-8 M	28321			-0.92834
10-9 M	18573	17337	23379		10-9 M	19763		0.89886		10-9 M	36326	38901	36039		10-9 M	37088.7		3.29376			10-9 M	17076	36433	36637		10-9 M	30048.7			0.0932282
10-10 M	24664	21914	24709		10-10 M	23762.3		3.62567		10-10 M	30765	32369	35736		10-10 M	32956.7		1.01368			10-10 M	32823	24063	34314		10-10 M	30400			0.300972
10-11 M	26076	25251	20271		10-11 M	23866		3.69635		10-11 M	34499	29618	31534		10-11 M	31883.7		0.421584			10-11 M	34787	26372	18244		10-11 M	26467.7			-2.02422
10-12 M	26923	27039	26320		10-12 M	26760.7		5.66997		10-12 M	36421	34100	33216		10-12 M	34579		1.9089			10-12 M	26964	28691	18231		10-12 M	24628.7			-3.11162
10-13 M	26603	19284	26938		10-13 M	24275		3.97521		10-13 M	29476	33908	33825		10-13 M	32403		0.708158			10-13 M	36899	31032	18922		10-13 M	28951			-0.555822
10-14 M	19149	21340	25429		10-14 M	21972.7		2.40544		10-14 M	33494	32841	35902		10-14 M	34079		1.63299			10-14 M	34862	19834	23623		10-14 M	26106.3			-2.23787
10-15 M	17311	20246	17975		10-15 M	18510.7		0.0449998		10-15 M	34817	29729	34758		10-15 M	33101.3		1.09351			10-15 M	25485	34917	33197		10-15 M	31199.7			0.773814
Basal media average	18222	17212	19900							Basal media average	30882	32541	29936								Basal media average	33791	23593	32289
BSA average		18444.7								BSA average		31119.7									BSA average	29891
Positive control		165112								Positive control		212341									Positive control	199010
